# Supplementary material for: Maf-family bZIP transcription factor NRL interacts with RNA-binding proteins and R-loops in retinal photoreceptors
Source: eLife journal article supplement (doi:10.7554/elife.103259), 2024-11-15
Supplement: fig4-data1 [file elife-103259-fig4-data1-v1.zip]

Fig. 4A

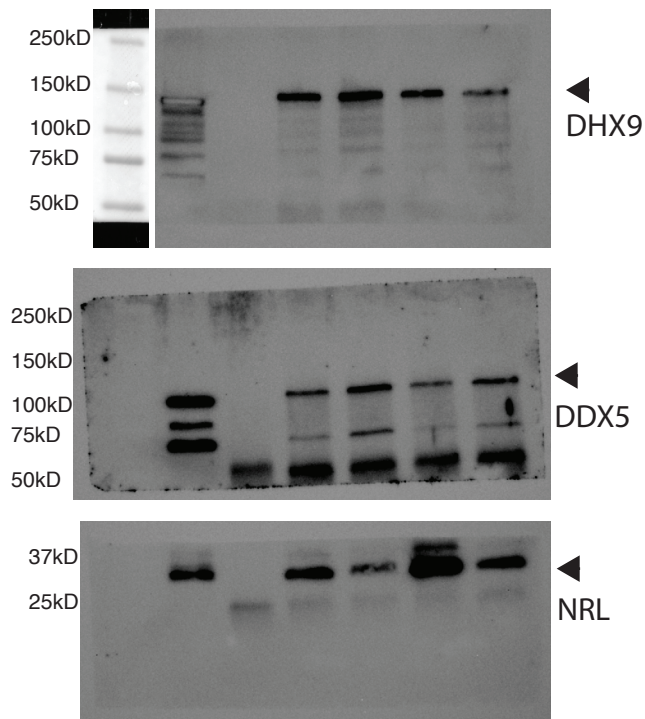

4B

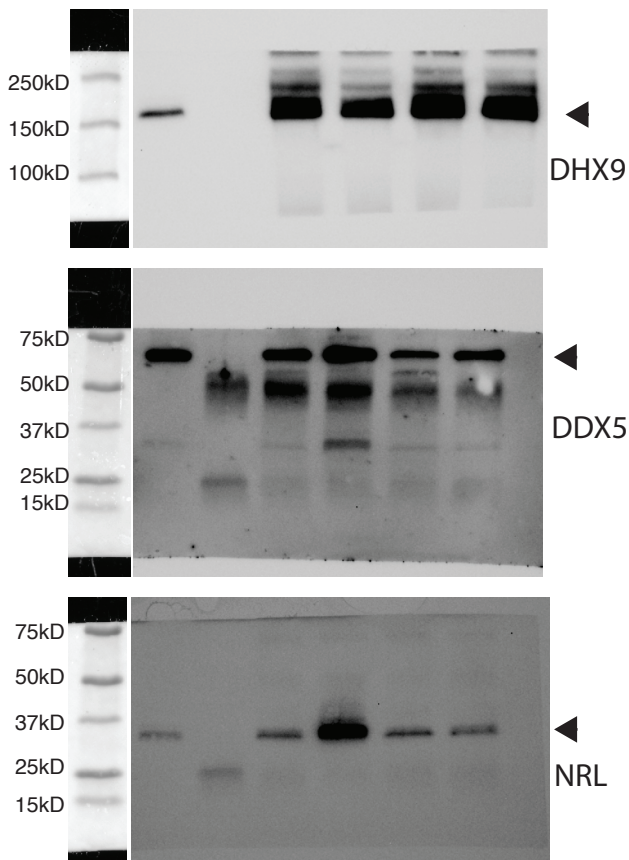

4E

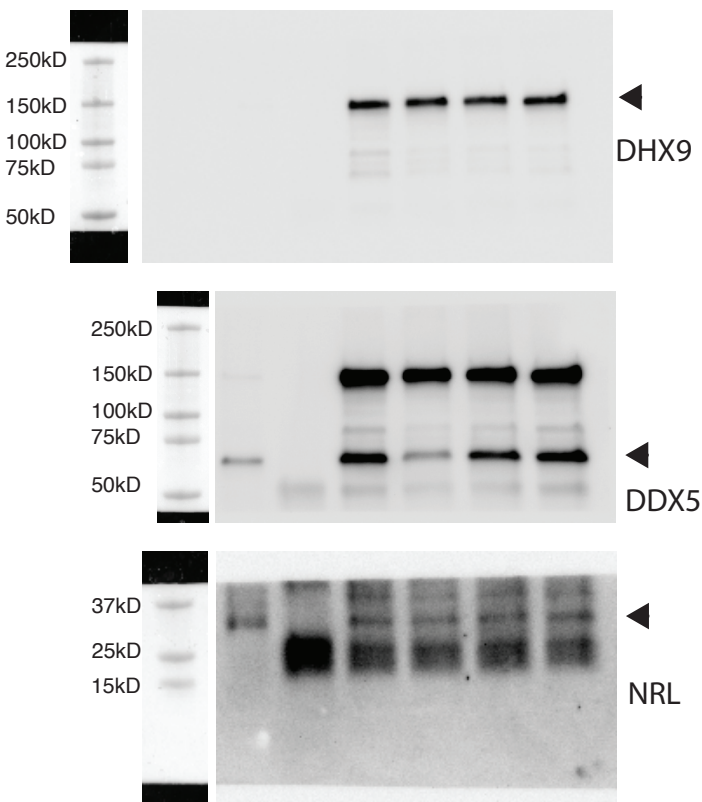

4F

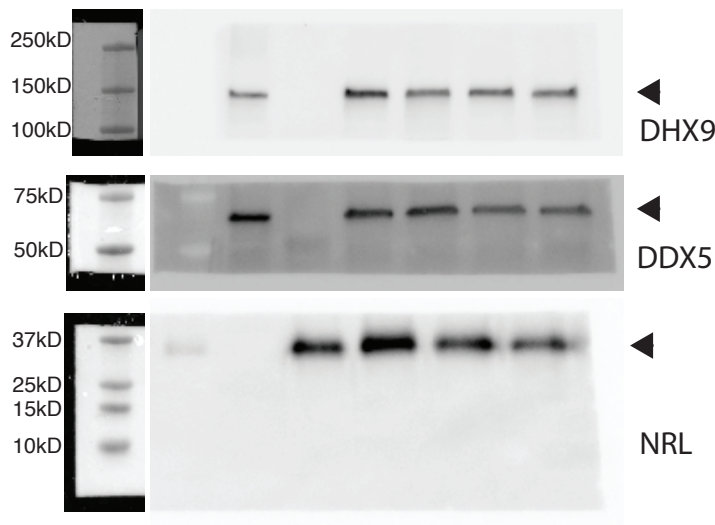

Figure 4, Source Data 1. Original blots corresponding to Figure 4, Panel A, B, E and F. Antibodies for immunoblots are shown. Arrows indicate protein bands.
