# Supplementary material for: Maf-family bZIP transcription factor NRL interacts with RNA-binding proteins and R-loops in retinal photoreceptors
Source: eLife journal article supplement (doi:10.7554/elife.103259), 2024-11-15
Supplement: fig5-data1 [file elife-103259-fig5-data1-v1.zip]

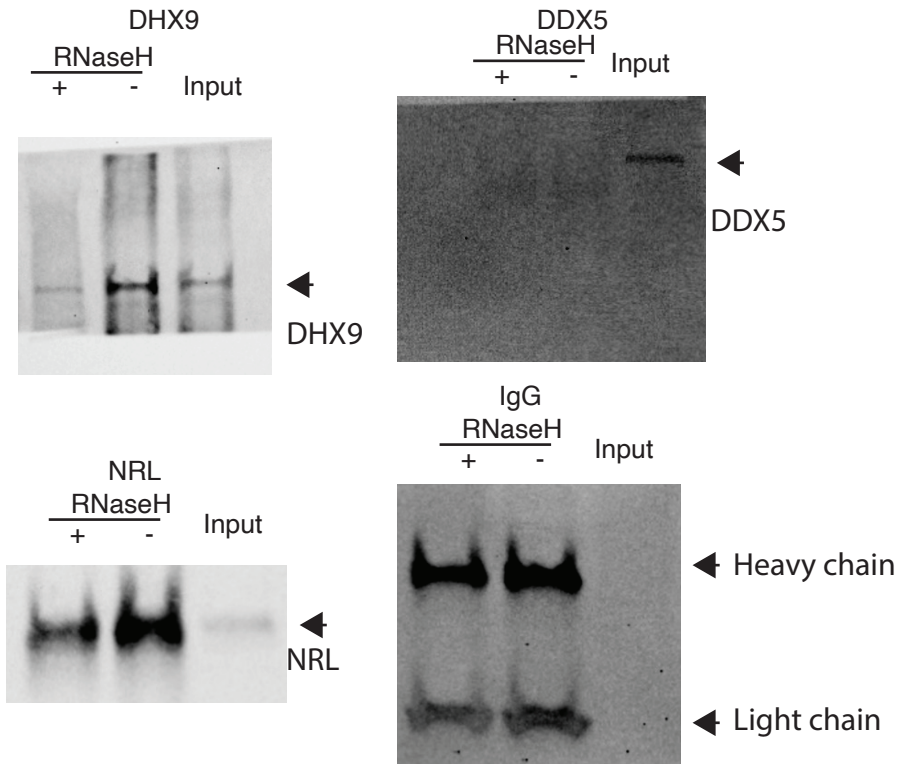

Figure 5, Source Data 1. Original blots corresponding to Figure 5, Panel A. Antibodies and RNaseH treatments are shown.
