# Supplementary material for: Maf-family bZIP transcription factor NRL interacts with RNA-binding proteins and R-loops in retinal photoreceptors
Source: eLife. 2025 Mar 6;13:RP103259. doi: 10.7554/eLife.103259 (PMC11884789; doi:10.7554/eLife.103259)
Supplement: Supplementary file 1. — Peptide spectrum match (PSM) values are shown for each protein. The listed proteins were enriched in three independent experiments. [file elife-103259-supp1.xlsx]

## Sheet: Sheet1
Figure 1-figure supplement 1. NRL-RBP interactors are enriched in R-loop proteins
Accession	Gene	Protein name	GST1	NRL1	GST2	NRL2	GST3	NRL3
XP_005208934.1	HNRNPM	Heterogeneous nuclear ribonucleoprotein M isoform X11 [Bos taurus]		68	1	163	4	109
AAI33330.1	HNRNPU	Heterogeneous nuclear ribonucleoprotein U (scaffold attachment factor A) [Bos taurus]	1	56		98	2	62
DAA13799.1	HNRNPUl1	TPA: heterogeneous nuclear ribonucleoprotein U-like [Bos taurus]		9		13		9
122145945	HNRNPA2/B1	Heterogeneous nuclear ribonucleoproteins A2/B1		4		26		17
82592672	CFDP2	Craniofacial development protein 2		6		18		11
122143188	PFKM	6-phosphofructokinase, muscle type		2		17		12
2500541	DHX9	ATP-dependent RNA helicase A		5		16		5
172046785	HNRNPA1	Heterogeneous nuclear ribonucleoprotein A1		1		16		12
122142416	AP2A2	AP-2 complex subunit alpha-2		1		9		6
1169457	EAAT1	Excitatory amino acid transporter 1		1		9		8
399012	SLC25A6	ADP/ATP translocase 3		1		6		2
109892458	HNRNPH2	Heterogeneous nuclear ribonucleoprotein H2		1		5		3
122132446	STRBP	Spermatid perinuclear RNA-binding protein		3		5		3
75057558	EPB41L5	Band 4.1-like protein 5		1		4		3
547891	MAP4	Microtubule-associated protein 4		1		4		4
108860929	RPL23A	60S ribosomal protein L23a		1		3		2
2495339	HSPA1B	Heat shock 70 kDa protein 1B		1		3		3
54040030	YBX1	Nuclease-sensitive element-binding protein 1		1		3		2
122132456	PRPF19	Pre-mRNA-processing factor 19		1		3		3
129204	RHO	Rhodopsin		1		3		1
166219437	RPS17	40S ribosomal protein S17		1		2		1
387935413	ZNF326	DBIRD complex subunit ZNF326		1		2		1
110278997	HIST1H2BK	Histone H2B type 1-K		1		2		3
126664	SLC25A11	Mitochondrial 2-oxoglutarate/malate carrier protein		2		2		2
121750	SLC2A1	Solute carrier family 2, facilitated glucose transporter member 1		1		2		1
120752	GABRA1	Gamma-aminobutyric acid receptor subunit alpha-1		2		1		1
122143023	H2AFJ	Histone H2A.J		1		1		1
148887198	HSPA8	Heat shock cognate 71 kDa protein		6	1	13		8
1709348	NRL	Neural retina-specific leucine zipper protein	1	15	4	36	4	32
